# Supplementary material for: A particle–carbon matrix architecture for long-term cycle stability of ZnFe2O4 anode
Source: Royal Society of Chemistry journal article supplement (doi:10.1039/c6ra04382h), 2016-01-01
Supplement: c6ra04382h1.pdf [file c6ra04382h1.pdf]

## Supporting Information

# A particle-carbon matrix architecture for long-term cycle stability of ZnFe<sub>2</sub>O<sub>4</sub> anode

*Hongyun Yue<sup>1,†,‡,§</sup>, Qiuxian Wang<sup>1, †,‡,§</sup>, Ting Du<sup>†,‡,§</sup>, Wanli Zhang<sup>†</sup>, Yun Qiao <sup>†,‡,§</sup>, Hongyu Dong  
<sup>†,‡,§</sup>, Yanhong Yin <sup>†,‡,§</sup> and Shuting Yang<sup>\*†,‡,§</sup>*

<sup>†</sup>School of Chemistry and Chemical Engineering, Henan Normal University, Xinxiang, Henan 453007, P. R. China.

<sup>‡</sup> National and Local Joint Engineering Laboratory of Motive Power and Key Materials, Xinxiang, Henan 453007, P. R. China.

<sup>§</sup>Collaborative Innovation Center of Henan Province for Motive Power and Key Materials, Henan Normal University, Xinxiang, Henan 453007, China.

Corresponding Author

\*E-mail: shutingyang@foxmail.com; Tel: (+86)-373-3326439

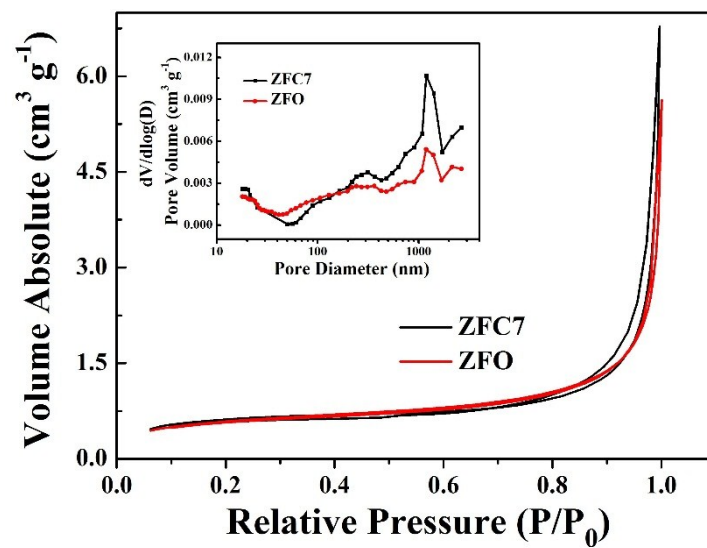

**Figure S1.** Nitrogen adsorption/desorption isotherms and pore size distribution plots (inset) of ZFC7 and ZFO.

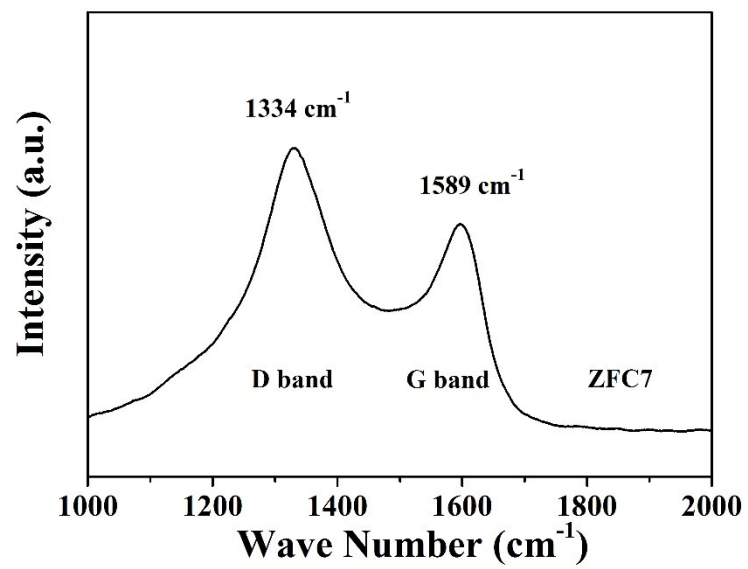

**Figure S2.** Raman spectra of ZFC7. The excitation wavelength is 633 nm.

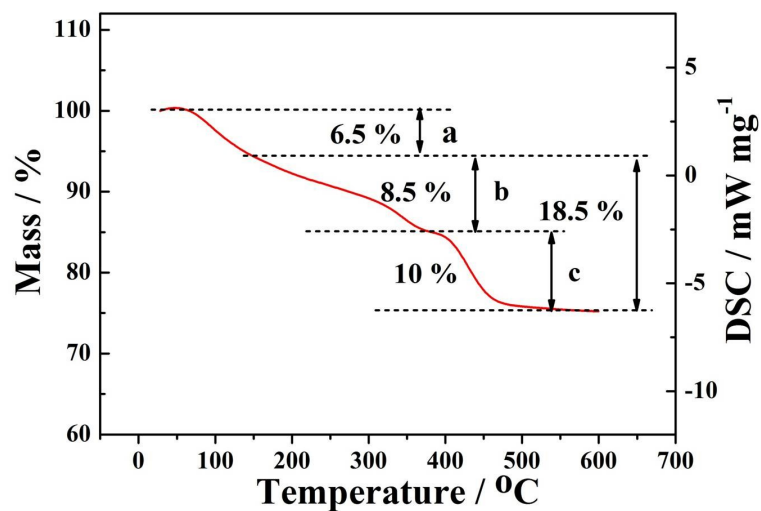

**Figure S3.** TG curves of as-synthesized ZFC7 with a heating rate of 10 °C min<sup>-1</sup> in flowing air atmosphere.

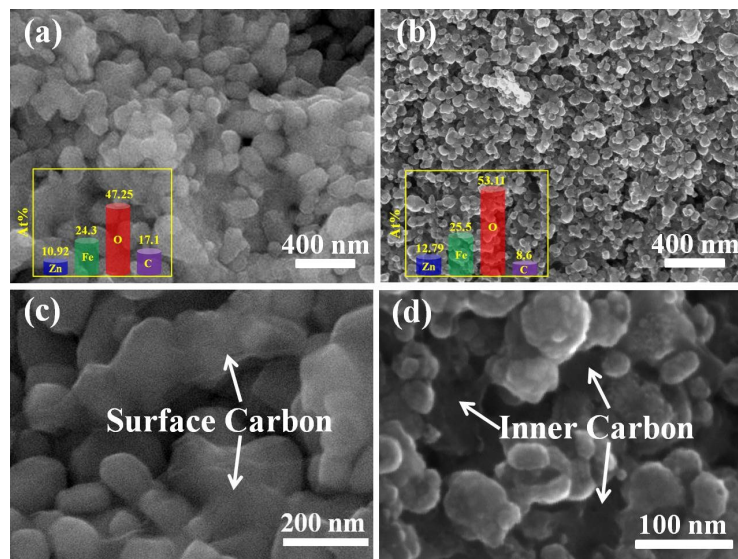

**Figure S4.** FESEM images of ZFC7 (a), (c) and ZFC7-4 (b), (d); the atom ratio of Zn, Fe, O and C is shown inset.

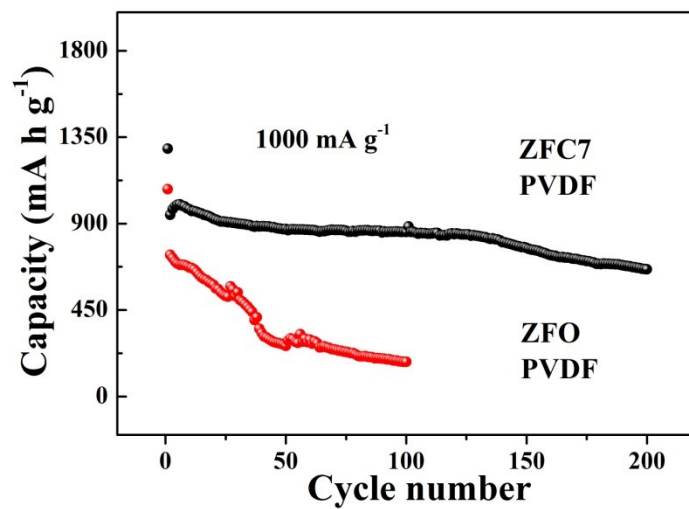

**Figure S5.** Cycling performances of ZFC7 and ZFO at 1000 mA g<sup>-1</sup> with PVDF binder.
